# Supplementary material for: “20 Years After…” GFE 2.0: A Theoretical Revision and Empirical Testing of the Concept of “Group-Focused Enmity” Based on Longitudinal Data
Source: Frontiers journal article supplement (doi:10.3389/fpos.2022.752810), 2022-04-28
Supplement: Table_1.docx [file Table_1.docx]

| Appendix 1a: Descriptive statistics for all indicators (cross-sectional data) | | | | | | | | | | | | | |
| --- | --- | --- | --- | --- | --- | --- | --- | --- | --- | --- | --- | --- | --- |
| Constructs | Labels | Cross-section 2003 | | | | | | Cross-section 2011 | | | | | |
| M | SD | SK | KT | n | Miss | M | SD | SK | KT | n | Miss |
| Racism | ra01 | 1.82 | 0.83 | 0.85 | 0.21 | 2899 | 3.4 | 1.94 | 0.80 | 0.63 | 0.05 | 1905 | 4.8 |
| ra03 | 1.59 | 0.82 | 1.36 | 1.23 | 2958 | 1.4 | 1.58 | 0.79 | 1.34 | 1.31 | 1922 | 3.9 |
| Sexism | sx03 | 1.96 | 0.90 | 0.72 | -0.96 | 2975 | 0.8 | 1.75 | 0.80 | 0.85 | 0.52 | 1986 | 0.7 |
| sx04 | 1.85 | 0.87 | 0.88 | 0.15 | 2969 | 1.0 | 1.58 | 0.72 | 1.21 | 1.43 | 1985 | 0.8 |
| Xenophobia | ff04d | 2.60 | 1.01 | -0.02 | -1.13 | 2880 | 4.0 | 2.37 | 0.97 | 0.28 | -0.89 | 1919 | 4.1 |
| ff08d | 2.11 | 0.93 | 0.64 | -0.36 | 2893 | 3.6 | 2.02 | 0.92 | 0.73 | -0.20 | 1914 | 4.3 |
| Anti-Semitism | as01 | 1.92 | 0.90 | 0.83 | -0.04 | 2827 | 5.8 | 1.67 | 0.82 | 1.18 | 0.84 | 1936 | 3.2 |
| as02 | 1.68 | 0.84 | 1.14 | 0.63 | 2841 | 5.3 | 1.46 | 0.71 | 1.59 | 2.20 | 1944 | 2.8 |
| Islamophobia | he05m | 2.03 | 0.98 | 0.72 | -0.46 | 2887 | 3.8 | 2.03 | 1.02 | 0.71 | -.060 | 1934 | 3.3 |
| he12m | 1.98 | 0.90 | 0.78 | -0.07 | 2885 | 3.8 | 1.88 | 0.88 | 0.88 | 0.19 | 1933 | 3.4 |
| Devaluation of homosexual persons | he01h | 2.14 | 1.18 | 0.48 | -1.30 | 2960 | 1.3 | 1.80 | 0.99 | 0.99 | -0.20 | 1985 | 0.8 |
| he02h | 2.19 | 1.11 | 0.50 | -1.09 | 2981 | 0.6 | 1.96 | 1.04 | 0.79 | -0.58 | 1982 | 0.9 |
| Devaluation of homeless people | he01o | 2.26 | 0.99 | 0.40 | -0.84 | 2956 | 1.5 | 2.24 | 0.95 | 0.42 | -0.71 | 1969 | 1.6 |
| he02o | 2.45 | 0.92 | 0.11 | -0.80 | 2931 | 2.3 | 2.29 | 0.91 | 0.28 | -0.70 | 1954 | 2.3 |
| Precedent rights of the established | ev03 | 2.55 | 0.96 | -.005 | -0.96 | 2966 | 1.1 | 2.48 | 0.97 | -0.01 | -0.99 | 1971 | 1.5 |
| ev04 | 2.09 | 1.01 | 0.56 | -0.78 | 2962 | 1.3 | 2.05 | 0.95 | 0.58 | -0.61 | 1977 | 1.2 |
| Social dominance orientation | do01 | 1.51 | 0.64 | 1.21 | 1.80 | 2978 | 0.7 | 1.52 | 0.62 | 1.11 | 1.71 | 1979 | 1.1 |
| do02 | 1.56 | 0.83 | 1.50 | 1.54 | 2964 | 1.2 | 1.56 | 0.80 | 1.44 | 1.51 | 1975 | 1.3 |
| do03 | 1.99 | 0.92 | 0.63 | -0.44 | 2939 | 2.0 | 2.15 | 0.96 | 0.40 | -0.80 | 1951 | 2.5 |
| *Notes*: Data base: Heitmeyer et al, 2013a (ZA5576), 2013b (ZA5568); (*Cross-section 2003*) n = 3000, (*Cross-section 2011*)n = 2000; M = mean value, SD = standard deviation, SK = skewness, KT = kurtosis, n = valid cases, Miss = missing values in percentages. | | | | | | | | | | | | | |

| Appendix 1b: Descriptive statistics for all indicators (panel data) | | | | | | | | | | | | | |
| --- | --- | --- | --- | --- | --- | --- | --- | --- | --- | --- | --- | --- | --- |
| Constructs | Labels | Panel 2006 | | | | | | Panel 2008 | | | | | |
| M | SD | SK | KT | n | Miss | M | SD | SK | KT | n | Miss |
| Racism | ra01 | 1.74 | 0.85 | 1.07 | 0.55 | 3097 | 0.7 | 1.71 | 0.75 | 1.02 | 0.97 | 1325 | 4.5 |
| ra03 | 1.51 | 0.75 | 1.49 | 1.79 | 3083 | 1.2 | 1.48 | 0.72 | 1.67 | 2.81 | 1333 | 3.9 |
| Sexism | sx03 | 1.91 | 0.85 | 0.77 | 0.07 | 3098 | 0.7 | 1.82 | 0.79 | 0.88 | 0.57 | 1378 | 0.6 |
| sx04 | 1.70 | 0.75 | 0.94 | 0.66 | 3105 | 0.5 | 1.66 | 0.74 | 1.13 | 1.29 | 1376 | 0.8 |
| Xenophobia | ff04d | 2.57 | 0.99 | 0.63 | -1.05 | 3038 | 1.2 | 2.39 | 0.95 | 0.33 | -0.81 | 1312 | 5.4 |
| ff08d | 2.06 | 0.89 | 0.73 | 0.01 | 2990 | 4.2 | 1.94 | 0.87 | 0.79 | 0.10 | 1323 | 4.6 |
| Anti-Semitism | as01 | 1.74 | 0.85 | 1.07 | 0.55 | 3030 | 2.9 | 1.66 | 0.80 | 1.16 | 0.87 | 1362 | 1.8 |
| as02 | 1.48 | 0.69 | 1.43 | 0.73 | 3056 | 2.1 | 1.46 | 0.66 | 1.29 | 1.18 | 1370 | 1.2 |
| Islamophobia | he05m | 2.10 | 0.94 | 0.62 | -0.44 | 3035 | 2.7 | 2.03 | 0.91 | 0.75 | -0.11 | 1351 | 2.6 |
| he12m | 2.03 | 0.87 | 0.73 | 0.01 | 3037 | 2.7 | 1.90 | 0.84 | 0.90 | 0.49 | 1357 | 2.2 |
| Devaluation of homosexual persons | he01h | 2.01 | 1.08 | 0.63 | -0.99 | 3096 | 0.8 | 1.92 | 1.03 | 0.72 | -0.77 | 1385 | 0.1 |
| he02h | 2.09 | 1.04 | 0.62 | -0.76 | 3105 | 0.5 | 2.04 | 1.02 | 0.74 | -0.58 | 1384 | 0.2 |
| Devaluation of homeless people | he01o | 2.24 | 0.89 | 0.44 | -0.50 | 3084 | 1.2 | 2.22 | 0.89 | 0.41 | -0.49 | 1368 | 1.4 |
| he02o | 2.30 | 0.86 | 0.25 | -0.54 | 3082 | 1.2 | 2.30 | 0.86 | 0.18 | -0.61 | 1373 | 1.0 |
| Precedent rights of the established | ev03 | 2.70 | 0.93 | -0.16 | -0.87 | 3096 | 0.8 | 2.42 | 0.97 | 0.01 | -1.01 | 1380 | 0.5 |
| ev04 | 2.30 | 0.99 | 0.33 | -0.89 | 3100 | 0.6 | 2.08 | 0.95 | 0.50 | -0.69 | 1381 | 0.4 |
| Social dominance orientation | do01 | 1.53 | 0.59 | 0.79 | 0.80 | 3101 | 0.6 | 1.44 | 0.57 | 1.15 | 1.74 | 1383 | 0.3 |
| do02 | 1.50 | 0.73 | 1.56 | 2.29 | 3090 | 1.0 | 1.48 | 0.71 | 1.53 | 2.10 | 1378 | 0.6 |
| do03 | 1.92 | 0.90 | 0.70 | -0.32 | 3056 | 2.1 | 1.87 | 0.88 | 0.75 | -0.23 | 1361 | 1.9 |
| *Notes*: Data base: Endrikat et al., 2015 (ZA5164); (*Panel 2006*) n = 3120, (*Panel 2008*) n = 1387; M = mean value, SD = standard deviation,  SK = skewness, KT = kurtosis, n = valid cases, Miss = missing values in percentages. | | | | | | | | | | | | | |

| Appendix 2: SCFA results for the first- and second-order measurement models | | | | | | | | | | | | |
| --- | --- | --- | --- | --- | --- | --- | --- | --- | --- | --- | --- | --- |
| Factor models and indicators/constructs | Cross-section 2003 | | | Cross-section 2011 | | | Panel 2006 | | | Panel 2008 | | |
| *B* | *ß* | *R²* | *B* | *ß* | *R²* | *B* | *ß* | *R²* | *B* | *ß* | *R²* |
| SCFA with first-order factors only | | | | | | | | | | | |
| Racism (*Racism*) |  |  |  |  |  |  |  |  |  |  |  |  |
| ra01  ra03 | .238  .275 | .629  .728 | .395  .530 | .291  .335 | .673  .775 | .435  .600 | .274  .305 | .682  .761 | .466  .579 | .175  .188 | .744  .798 | .554  .637 |
| Established (*Evated*) |  |  |  |  |  |  |  |  |  |  |  |  |
| ev03  ev04 | .379  .473 | .643  .801 | .414  .642 | .408  .493 | .687  .828 | .472  .686 | .391  .461 | .660  .780 | .436  .608 | .308  .349 | .664  .753 | .441  .568 |
| Sexism (*Women*) |  |  |  |  |  |  |  |  |  |  |  |  |
| sx03  sx04 | .608  .683 | .793  .890 | .628  .792 | .548  .672 | .745  .914 | .555  .835 | .585  .461 | .763  .914 | .583  .835 | .572  .684 | .792  .947 | .627  .897 |
| Xenophobia (*Xeno*) |  |  |  |  |  |  |  |  |  |  |  |  |
| ff04d  ff08d | .457  .436 | .832  .793 | .692  .629 | .563  .524 | .911  .847 | .829  .718 | .437  .424 | .833  .809 | .694  .654 | .463  .458 | .848  .839 | .719  .704 |
| Islamophobia (*Islamo*) |  |  |  |  |  |  |  |  |  |  |  |  |
| he05m  he12m | .398  .409 | .723  .742 | .523  .551 | .524  .572 | .818  .893 | .668  .797 | .496  .424 | .775  .866 | .600  .750 | .507  .545 | .816  .878 | .666  .771 |
| Anti-Semitism (*Antisem*) |  |  |  |  |  |  |  |  |  |  |  |  |
| as01  as02 | .549  .604 | .797  .878 | .635  .771 | .535  .571 | .809  .862 | .655  .744 | .554  .531 | .858  .822 | .737  .676 | .519  .518 | .861  .859 | .741  .737 |
| Homophobia (*Homo*) |  |  |  |  |  |  |  |  |  |  |  |  |
| he01h  he02h | .542  .598 | .728  .804 | .530  .647 | .595  .747 | .749  .940 | .562  .883 | .569  .660 | .741  .853 | .549  .727 | .551  .637 | .753  .870 | .567  .758 |
| Homeless (*Hless*) |  |  |  |  |  |  |  |  |  |  |  |  |
| he01o  he02o | .726  .476 | .895  .591 | .800  .349 | .627  .493 | .778  .681 | .606  .464 | .649  .536 | .805  .669 | .647  .448 | .617  .592 | .767  .735 | .588  .541 |
| Social dominance orientation (*SDO*) | | | | | | | | | | | | |
| do01  do02  do03 | .846  1.184  .917 | .672  .764  .600 | .452  .584  .360 | .943  1.061  .810 | .752  .748  .682 | .565  .559  .465 | .995  1.048  .920 | .748  .767  .666 | .560  .588  .443 | .920  1.088  .852 | .771  .797  .682 | .595  .635  .465 |
|  | SCFA with first- and second-order factors | | | | | | | | | | | |
| Ideology of inequality (*Ideology*) | | | | | | | | | | | | |
| Racism  Established  Sexism | 2.449  1.369  .836 | .926  .808  .642 | .857  .654  .412 | 2.086  1.352  .921 | .902  .804  .677 | .813  .647  .459 | 2.284  1.361  .827 | .916  .806  .637 | .839  .650  .406 | 4.139  1.911  .957 | .972  .886  .692 | .945  .785  .478 |
| Social prejudice (*Prejudice*) | | | | | | | | | | | | |
| Xenophobia  Islamophobia  Anti-Semitism  Homophobia  Homeless | 1.522  1.517  1.054  .898  .721 | .836  .835  .725  .668  .585 | .698  .697  .526  .447  .342 | 1.272  1.196  1.133  .765  .724 | .786  .767  .750  .607  .592 | .618  .589  .562  .369  .350 | 1.622  1.201  1.184  .825  .741 | .851  .768  .764  .637  .595 | .725  .591  .583  .405  .354 | 1.535  1.263  1.322  .932  .737 | .838  .784  .797  .682  .594 | .702  .615  .636  .465  .352 |
| *Notes*: Indicated are the unstandardized coefficients (*B*), the standardized coefficients (*ß*), and the explained variance (*R²*); All estimates are significant at the p-level ≤ .01; Abbreviations are shown in parentheses (e.g. *Xeno* for *Xenophobia*) as used in figure 2; CFI = Comparative fit index;  TLI = Tucker Lewis Index; RMSEA = Root mean square error of approximation; Model fit of the second-order factor models: (*Cross-section 2003*)  χ² = 1083.514, df = 140, CFI = .975, TLI = 969, RMSEA = .047; (*Cross-section 2011*) χ² = 713.851, df = 140, CFI = .980, TLI = 976,  RMSEA = .045; (*Panel 2006*) χ² = 1143.377, df = 140, CFI = .976, TLI = 970, RMSEA = .048; (*Panel 2008*) χ² = 691.813, df = 140, CFI = .974,  TLI = 968, RMSEA = .053. | | | | | | | | | | | | |
